# Supplementary material
Source: PubMed Central journal article supplement (PMC7561303)
Supplement: mmc1.pdf [file mmc1.pdf]

# THE LANCET

## Global Health

### Supplementary appendix

This appendix formed part of the original submission and has been peer reviewed. We post it as supplied by the authors.

Supplement to: Garber K, Fox C, Abdalla M, et al. Estimating access to health care in Yemen, a complex humanitarian emergency setting: a descriptive applied geospatial analysis. *Lancet Glob Health* 2020; **8**: e1435–43.

## Appendix

## Appendix Table of Contents

| <b>Appendix Figures</b>                                                                                                                                                     | <b>Page</b> |
|-----------------------------------------------------------------------------------------------------------------------------------------------------------------------------|-------------|
| Figure 1a: Geocoded locations of functional or partially functional public primary health-care facilities and hospitals                                                     | 3           |
| Figure 1b: Updated population spatial distribution mapping for Yemen, 2018                                                                                                  | 4           |
| Figure 1c: Updated digitized road network map for Yemen                                                                                                                     | 5           |
| Figure 2a: District-level headcount of Yemenis living greater than one-hour travel time from nearest functional or partially functional public primary health-care facility | 6           |
| Figure 2b: District-level headcount of Yemenis living greater than two-hour travel time from nearest functional or partially functional public hospital                     | 7           |
| <b>Appendix Tables</b>                                                                                                                                                      |             |
| Table 1: Ranking of districts with poorest access to healthcare, by absolute headcount                                                                                      | 8           |
| Table 2: Population living within specified time of nearest health facility (%), by mode of access                                                                          | 9           |

**Figure 1a: Geocoded locations of functional or partially functional public primary health-care facilities and hospitals**

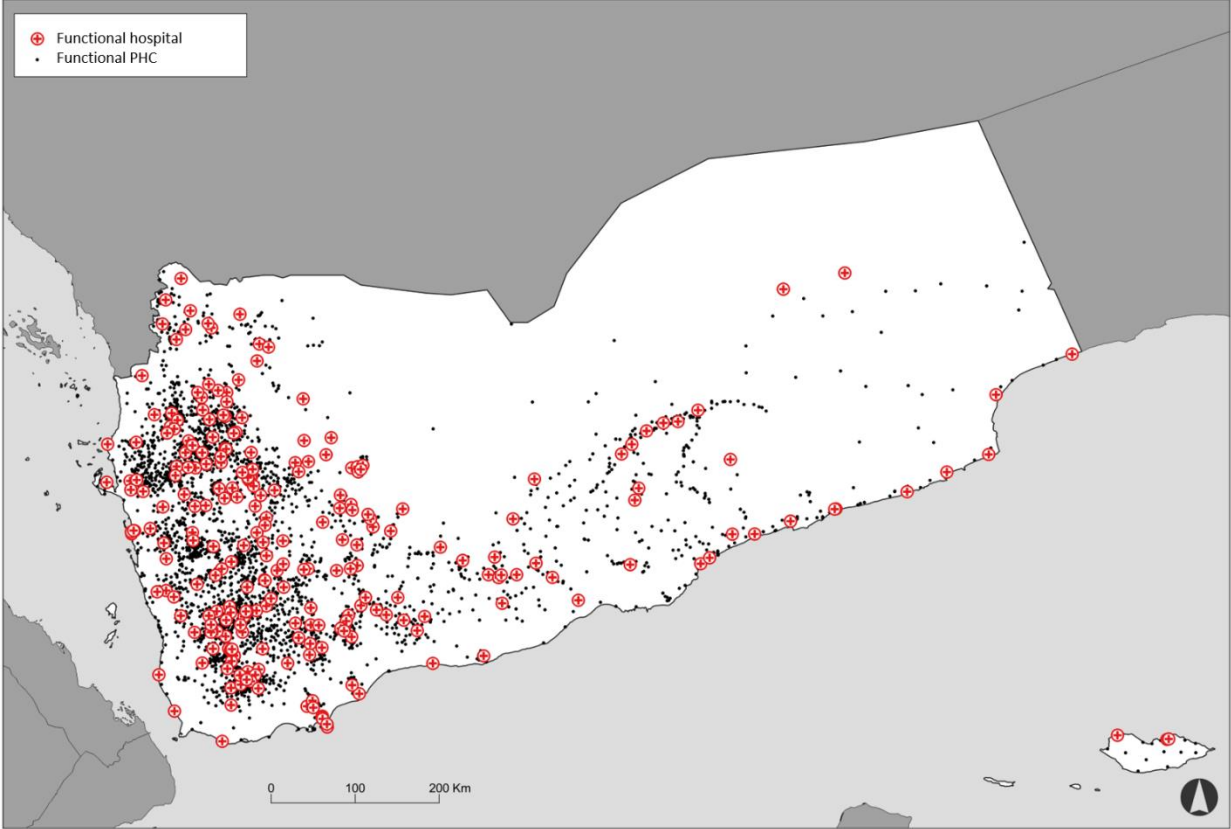

Figure 1b: Updated population spatial distribution mapping for Yemen, 2018

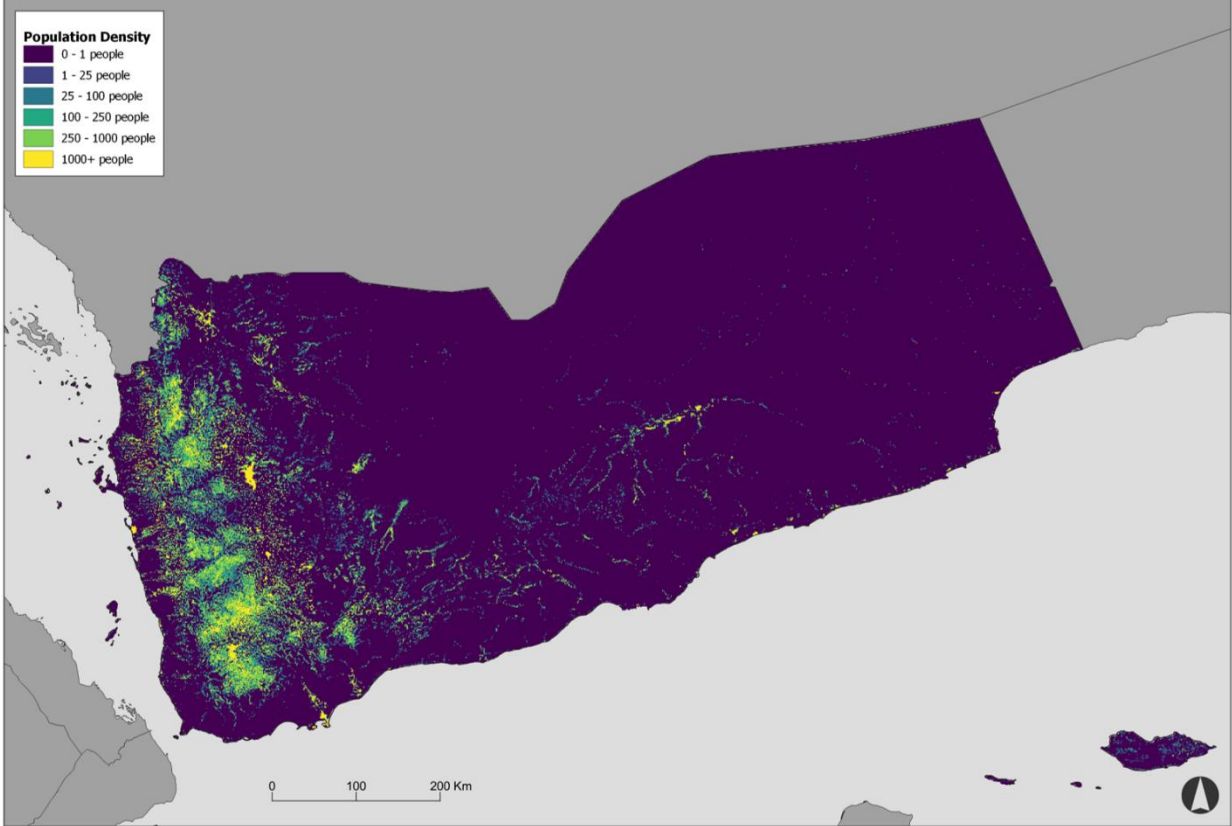

Figure 1c: Updated digitized road network map for Yemen

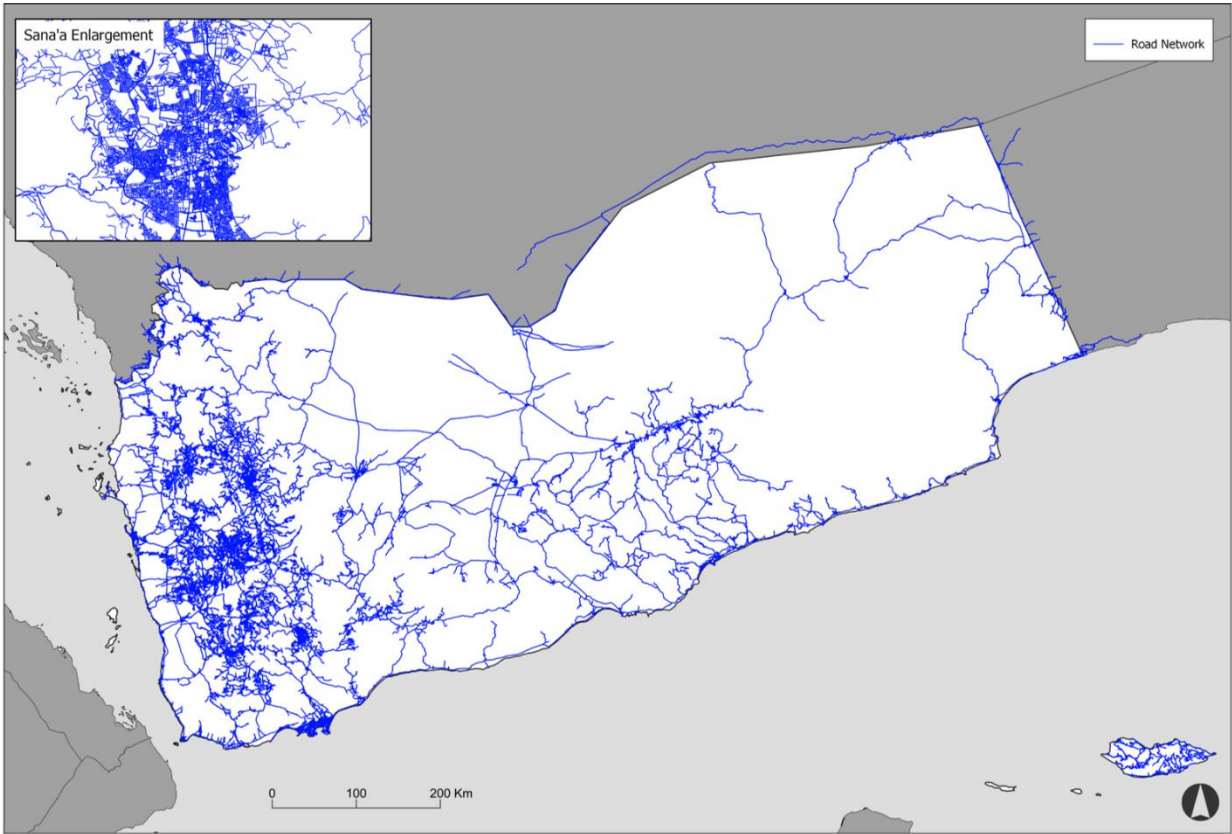

**Figure 2a: District-level headcount of Yemenis living greater than one-hour travel time from nearest functional or partially functional public primary health-care facility**

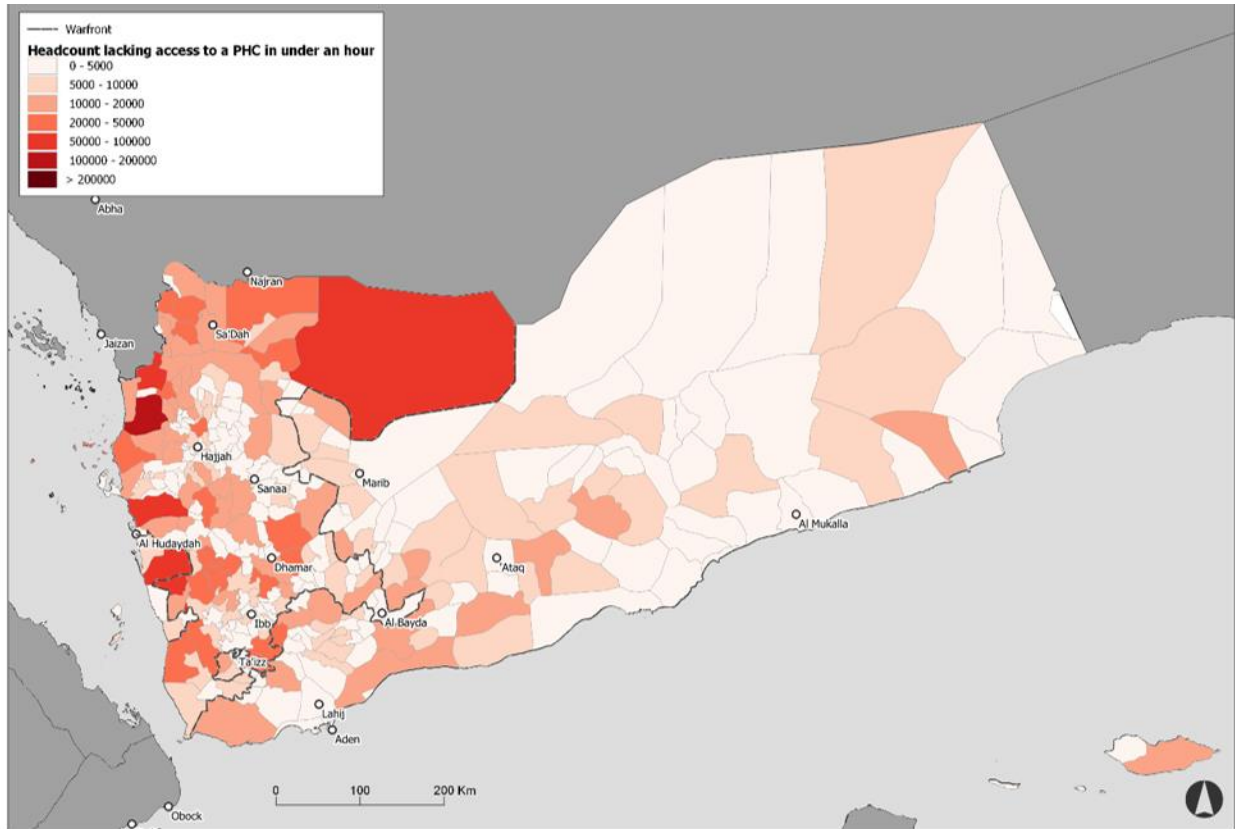

**Figure 2b: District-level headcount of Yemenis living greater than two-hour travel time from nearest functional or partially functional public hospital**

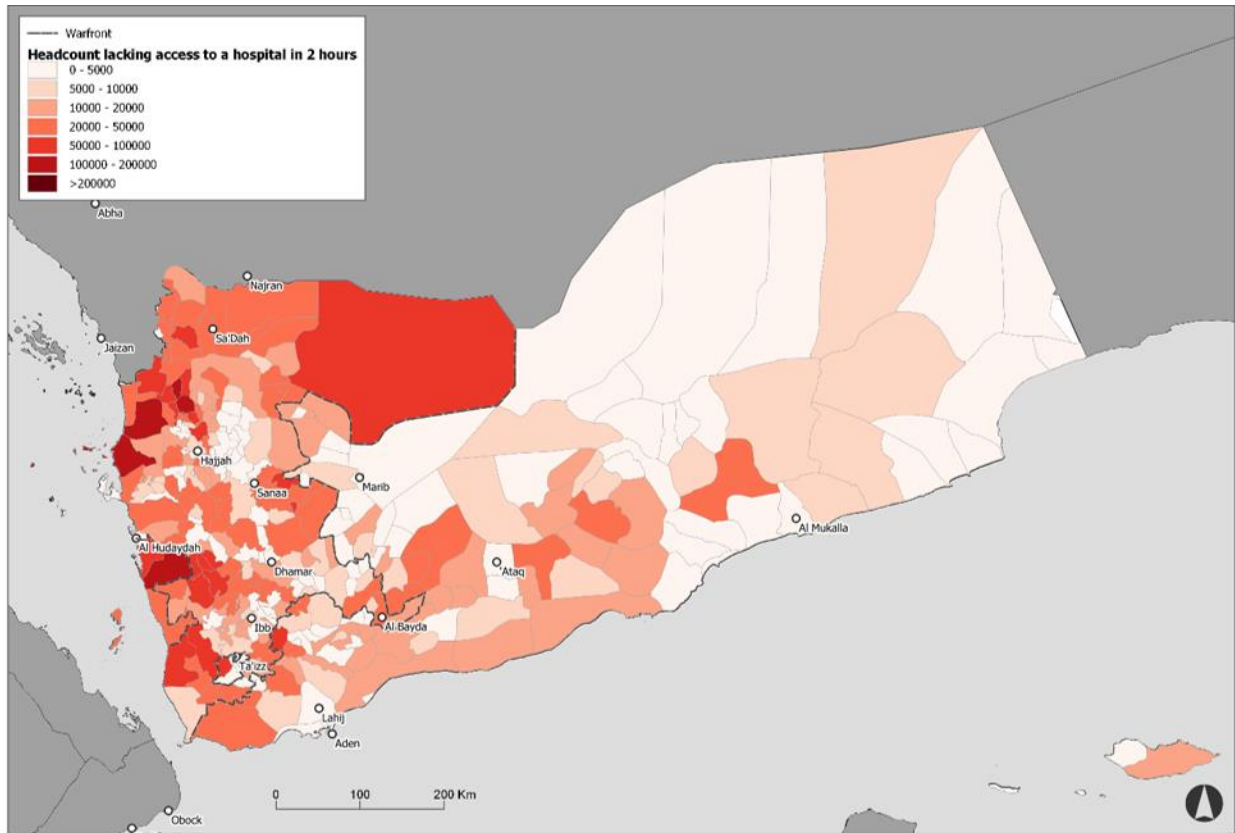



| <b>Appendix Table 1: Ranking of districts with poorest access to healthcare, by absolute headcount</b> |                     |                    |                                              |                              |                 |                     |                    |                                                   |                              |
|--------------------------------------------------------------------------------------------------------|---------------------|--------------------|----------------------------------------------|------------------------------|-----------------|---------------------|--------------------|---------------------------------------------------|------------------------------|
| <b>PHC</b>                                                                                             |                     |                    |                                              |                              | <b>Hospital</b> |                     |                    |                                                   |                              |
| <b>Rank</b>                                                                                            | <b>District</b>     | <b>Governorate</b> | <b># ppl living &gt; 1h from nearest PHC</b> | <b>% district population</b> | <b>Rank</b>     | <b>District</b>     | <b>Governorate</b> | <b># ppl living &gt; 2h from nearest hospital</b> | <b>% district population</b> |
| <b>1</b>                                                                                               | Abs                 | Hajjah             | 111,355                                      | 56.7%                        | <b>1</b>        | Abs                 | Hajjah             | 131,997                                           | 68.1%                        |
| <b>2</b>                                                                                               | Bayt Al Faqiah      | Al Hudaydah        | 68,389                                       | 38.5%                        | <b>2</b>        | Washhah             | Hajjah             | 122,390                                           | 100.0%                       |
| <b>3</b>                                                                                               | Zabid               | Al Hudaydah        | 61,295                                       | 53.5%                        | <b>3</b>        | Kushar              | Hajjah             | 120,309                                           | 99.8%                        |
| <b>4</b>                                                                                               | Khabb wa ash Sha'af | Al Jawf            | 60,283                                       | 82.4%                        | <b>4</b>        | Alluheyah           | Al Hudaydah        | 115,383                                           | 71.3%                        |
| <b>5</b>                                                                                               | Harad               | Hajjah             | 59,215                                       | 61.7%                        | <b>5</b>        | Bayt Al Faqiah      | Al Hudaydah        | 112,106                                           | 41.0%                        |
| <b>6</b>                                                                                               | Bajil               | Al Hudaydah        | 55,982                                       | 47.0%                        | <b>6</b>        | Wusab Al Ali        | Dhamar             | 96,911                                            | 38.7%                        |
| <b>7</b>                                                                                               | Majz                | Sa'dah             | 43,685                                       | 66.3%                        | <b>7</b>        | Khabb wa ash Sha'af | Al Jawf            | 96,604                                            | 100.0%                       |
| <b>8</b>                                                                                               | Al Mukha            | Ta'izz             | 43,592                                       | 86.4%                        | <b>8</b>        | Mustaba             | Hajjah             | 85,192                                            | 100.0%                       |
| <b>9</b>                                                                                               | Utмах               | Dhamar             | 40,449                                       | 24.5%                        | <b>9</b>        | Al Husha            | Al Dali'           | 82,959                                            | 85.0%                        |
| <b>10</b>                                                                                              | Wusab Al Ali        | Dhamar             | 34,398                                       | 21.9%                        | <b>10</b>       | Ad Durayhimi        | Al Hudaydah        | 80,220                                            | 100.0%                       |

| <b>Travel time</b>      | <b>Nearest PHC with vehicle access</b> | <b>Nearest PHC by foot</b> | <b>Nearest Hospital with vehicle</b> | <b>Nearest hospital by foot</b> |
|-------------------------|----------------------------------------|----------------------------|--------------------------------------|---------------------------------|
| <b>&lt; 30 minutes</b>  | 69.4%                                  | 55%                        | 37.4%                                | 17%                             |
| <b>&lt; 60 minutes</b>  | 90.9%                                  | 82%                        | 57.6%                                | 32%                             |
| <b>&lt; 120 minutes</b> | 98.4%                                  | 97%                        | 80.5%                                | 52%                             |
